# Supplementary material for: In situ generation of Li2FeSiO4 coating on MWNT as a high rate cathode material for lithium ion batteries
Source: Royal Society of Chemistry journal article supplement (doi:10.1039/c2jm33855f), 2012-01-01
Supplement: c2jm33855f.pdf [file c2jm33855f.pdf]

**Supporting Information:**

**In situ generation of  $\text{Li}_2\text{FeSiO}_4$  coating on MWNT as a high rate cathode material for lithium ion batteries**

**Yi Zhao, Jiaxin Li, Ning Wang, Chuxin Wu, Yunhai Ding, Lunhui Guan\***

*State Key Laboratory of Structural Chemistry, Fujian Institute of Research on the Structure of Matter, Chinese Academy of Sciences, Yangqiao West Road 155#, Fuzhou, Fujian 350002, P.R. China.*

*E-mail: [guanlh@fjirsm.ac.cn](mailto:guanlh@fjirsm.ac.cn)*

## Experimental Details

**Synthesis of MWNT@SiO<sub>2</sub> composite:** The pristine multi-walled carbon nanotube (MWNT) with diameter of 30-50 nm (purchased from Shenzhen Nanotech Por Co. Ltd) was firstly refluxed in nitric acid (65 wt %) at 140 °C for 6 hours before use. The MWNT@SiO<sub>2</sub> composite was synthesized according to the previously reported method<sup>1</sup>. In a typical experiment, 320 mg acid-MWNT was dispersed in 160 mL ethanol and 16 mL de-ionized water and sonicated for 3 hours to form a homogeneous solution. Then, 2 mL NH<sub>3</sub>.H<sub>2</sub>O (25-28 wt%) and 1.36 mL tetraethoxysilane (TEOS) were added into the above solution under stirring and kept for 24 hours. The final product was filtered and washed with de-ionized water and ethanol for several times, then dried at 80°C overnight.

**Synthesis of MWNT@Li<sub>2</sub>FeSiO<sub>4</sub> composite:** The MWNT@Li<sub>2</sub>FeSiO<sub>4</sub> composite was synthesized via a solid-state reaction. Firstly, the stoichiometric amounts of MWNT@SiO<sub>2</sub>, lithium acetate dehydrate and ferric oxalate were dissolved in 20 mL ethanol and sonicated for 3 hours. Then the solution was stirred at 60 °C to evaporate the ethanol. Finally, the obtained mixture was ground into power, pressed into plates, and subsequently calcinated at 600 °C for 5 hours under Ar atmosphere.

**Synthesis of pure Li<sub>2</sub>FeSiO<sub>4</sub>:** The pure Li<sub>2</sub>FeSiO<sub>4</sub> was prepared according to a previous report.<sup>2</sup> The stoichiometric amounts of lithium acetate dehydrate, ferric oxalate and Si(OC<sub>2</sub>H<sub>5</sub>)<sub>4</sub> were dissolved in 30 mL ethanol. The mixture was then evaporated at 50 °C under stirring. The resulting powder was pressed into plates and calcinated at 700 °C for 12 hours under Ar atmosphere.

**Sample characterization:** The morphology and structure characterization of the MWNT, MWNT@SiO<sub>2</sub>, and MWNT@Li<sub>2</sub>FeSiO<sub>4</sub> samples were performed by transmission electron microscope (TEM, JEM-2010) and X-ray diffraction (XRD, RIGAKU SCXmini). The energy dispersive X-ray spectroscopy (EDS) device was used to identify the element components of the samples. Thermogravimetry analyses (TGA, NETZSCH STA449C) were measured from 30 to 900 °C at a heating rate of 10 K min<sup>-1</sup> in air to determine the carbon content in these samples.

**Electrochemical measurements:** The electrochemical measurements were performed via a CR2025 coin-type test cell. To fabricate the working electrode, 70 wt% active material (MWNT@Li<sub>2</sub>FeSiO<sub>4</sub>, or pure Li<sub>2</sub>FeSiO<sub>4</sub> physically mixed with MWNT in a weight ratio with 80:20), 20 wt% conductivity agent (ketjen black, KB), and 10 wt% polymer binder (polyvinylidene fluoride, PVDF) were mixed with 1-methyl-2-pyrrolidinone (NMP). The resultant slurry was then pasted on stainless steel collector and dried at 80 °C for 12 h under vacuum. Pure lithium foil was used as both counter and reference electrode and the electrolyte was 1 M LiPF<sub>6</sub> in EC: EMC: DMC (1:1:1 in volume). Cells were assembled in an Ar-filled glove box. The galvanostatic charge/discharge test was carried out on a LAND 2001A system over a range of 1.5 V to 4.7 V at room temperature. The specific charge/discharge capacities mentioned in this article were calculated based on the mass of Li<sub>2</sub>FeSiO<sub>4</sub>.

- [1] K. G. Lee, R. Wi, M. Imran, T. J. Park, J. Lee, S. Y. Lee and D. H. Kim, *Acs Nano*, 2010, **4**, 3933-3942.
- [2] L. M. Li, H. J. Guo, X. H. Li, Z. X. Wang, W. J. Peng, K. X. Xiang and X. Cao, *J. Power Sources*, 2009, **189**, 45-50.

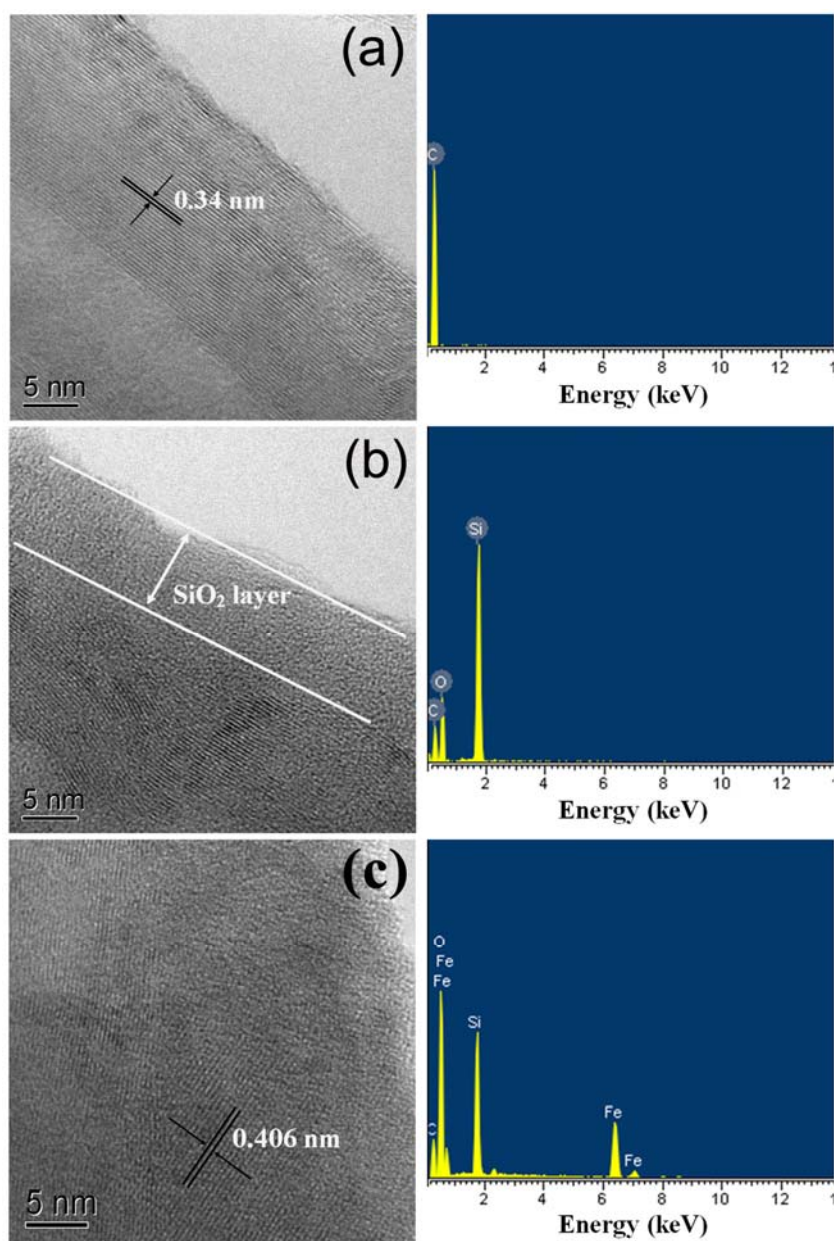

**Fig. S1 High resolution TEM and the corresponding energy dispersive spectroscopy (EDS) spectrums of (a) MWNT, (b) MWNT@SiO<sub>2</sub>, and (c) MWNT@Li<sub>2</sub>FeSiO<sub>4</sub>.** (a) The HRTEM clearly shows the regular interplanar spacing of 0.34 nm for MWNTs. (b) The amorphous SiO<sub>2</sub> layer with a thickness of 10 nm was uniformly coated on the surface of MWNT. The regular interlayer spacing of 0.406 nm is ascribed to the (002) planes of monoclinic Li<sub>2</sub>FeSiO<sub>4</sub>, as shown in (c). The EDX spectrum indicates the presence of MWNT along with the prepared Li<sub>2</sub>FeSiO<sub>4</sub>.

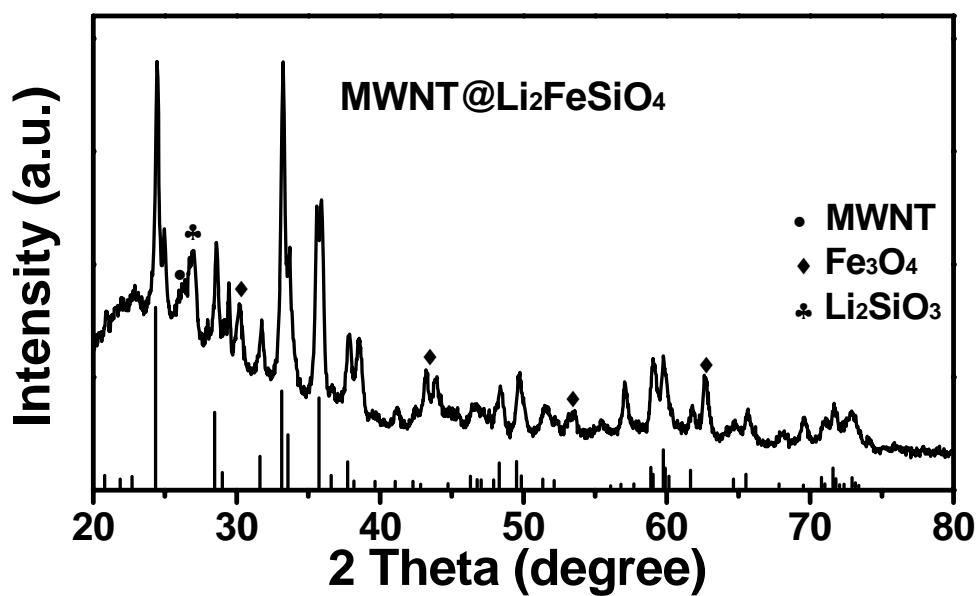

**Fig. S2 XRD pattern of the MWNT@Li<sub>2</sub>FeSiO<sub>4</sub> coaxial nanocable.** The main diffraction peaks of the MWNT@Li<sub>2</sub>FeSiO<sub>4</sub> composite could be indexed to the monoclinic Li<sub>2</sub>FeSiO<sub>4</sub> with P2<sub>1</sub>/n space group. A small amount of Fe<sub>3</sub>O<sub>4</sub> and Li<sub>2</sub>SiO<sub>3</sub> can also be detected in this composite. The diffraction peak near 26° was resulted from the MWNT.

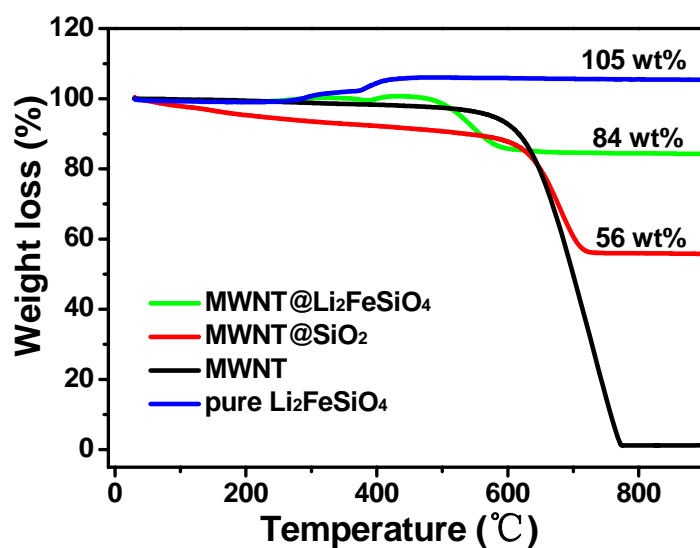

**Fig. S3 Thermal gravimetric analysis (TGA) curves of the MWNT, MWNT@SiO<sub>2</sub>, MWNT@Li<sub>2</sub>FeSiO<sub>4</sub>, and pure Li<sub>2</sub>FeSiO<sub>4</sub> samples. The decomposition of MWNT takes place between 500 and 770 °C. The content of SiO<sub>2</sub> in the MWNT@SiO<sub>2</sub> composite is about 56 wt%. The pure Li<sub>2</sub>FeSiO<sub>4</sub> suffered from a weight increase from 100 wt% to 105 wt%. For MWNT@Li<sub>2</sub>FeSiO<sub>4</sub> composite, the final residues have the same composition with the pure Li<sub>2</sub>FeSiO<sub>4</sub> sample after 900 °C. So the weight content of Li<sub>2</sub>FeSiO<sub>4</sub> in the MWNT@Li<sub>2</sub>FeSiO<sub>4</sub> composite = 84 wt% / 105 % = 80 wt%.**

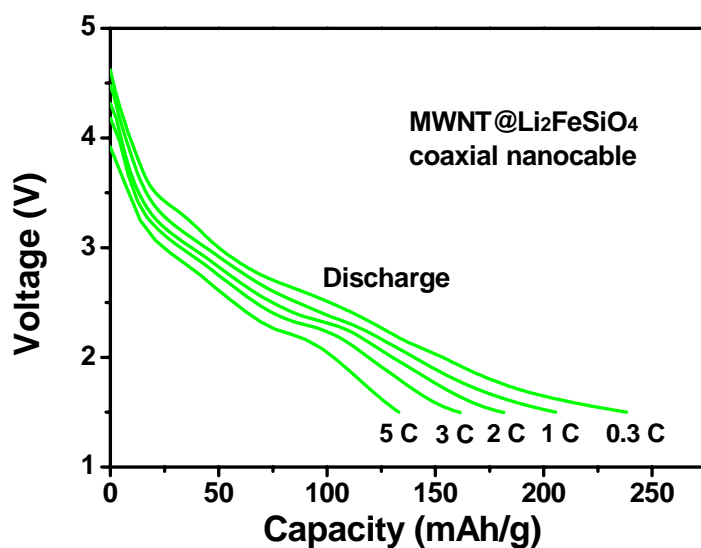

**Fig. S4** The representative discharge curves of the MWNT@Li<sub>2</sub>FeSiO<sub>4</sub> composite under various current densities from 0.3 C to 5 C. At a low current density of 50 mA g<sup>-1</sup> (0.3 C), the Li<sub>2</sub>FeSiO<sub>4</sub> shell exhibited a stable discharge capacity of ~240 mAh g<sup>-1</sup>, corresponding to 1.44 Li<sup>+</sup> ion per formula insertion into the host matrix. More surprising, even at a high current density of 2C, this Li<sub>2</sub>FeSiO<sub>4</sub> could still delivered more than one lithium insertion with capacities around 180 mAh g<sup>-1</sup>.

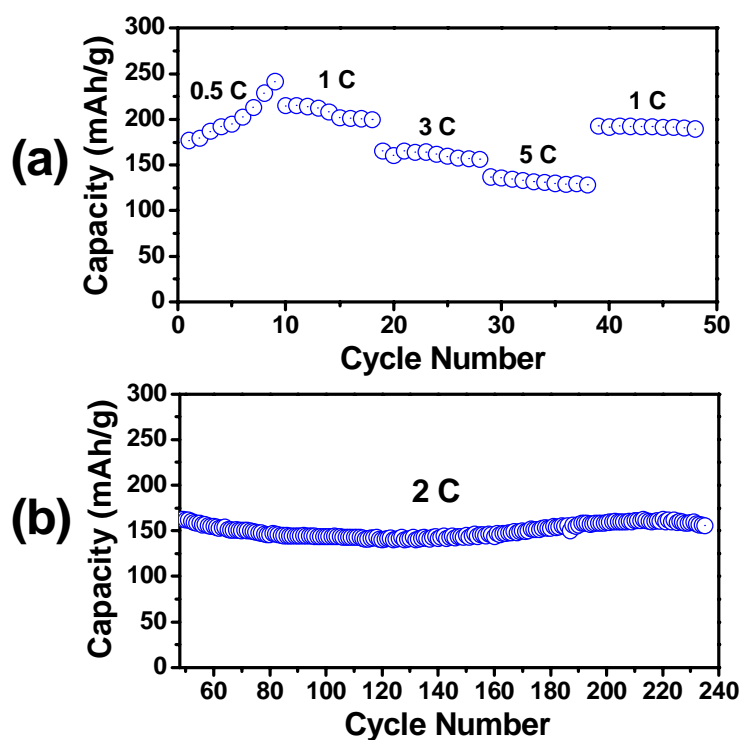

**Fig. S5** Electrochemical performance of another cell made with MWNT@Li<sub>2</sub>FeSiO<sub>4</sub> coaxial nanocable. Though there were variations from cell to cell, the excellent rate performance of this composite shown in Figure 3b could be repeatable. Furthermore, the specific capacity of this composite still kept around 160 mAh g<sup>-1</sup> after 230 cycles at a high current density of 2C, demonstrating the excellent cycling performance of our MWNT@Li<sub>2</sub>FeSiO<sub>4</sub> composite.



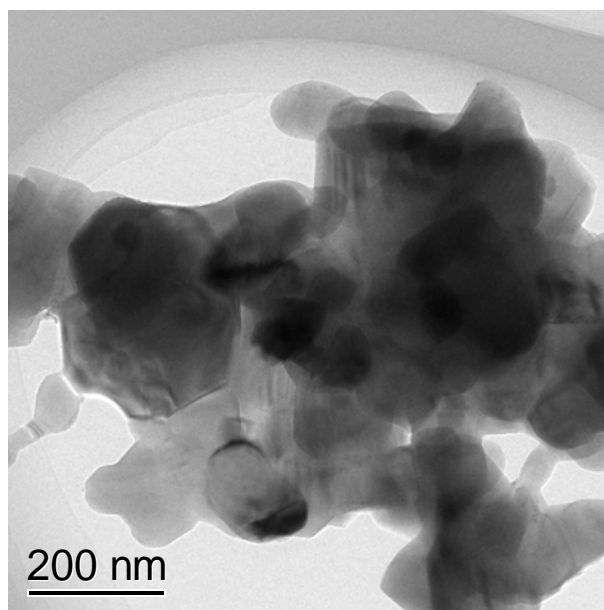

**Fig. S6 TEM image of the pure Li<sub>2</sub>FeSiO<sub>4</sub>.** As can be seen, the pure Li<sub>2</sub>FeSiO<sub>4</sub> presented an irregular and agglomerated morphology with particles size from 60-300 nm.

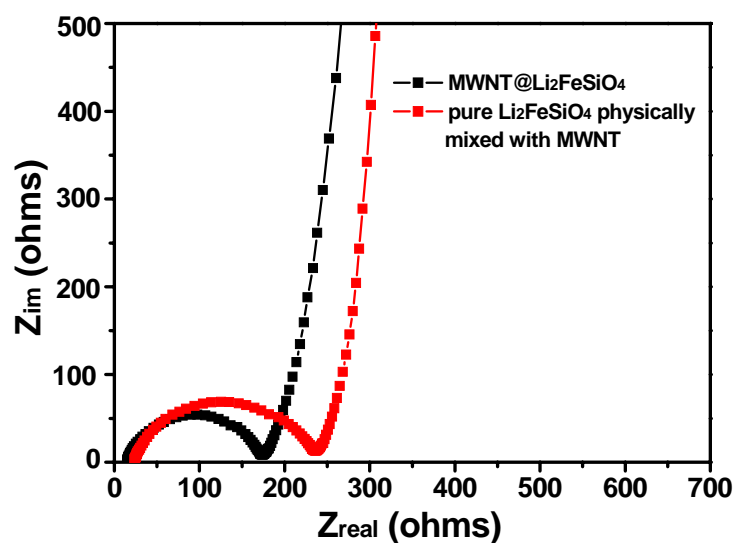

**Fig. S7** Electrochemical impedance spectra for MWNT@Li<sub>2</sub>FeSiO<sub>4</sub> coaxial nanocable and pure Li<sub>2</sub>FeSiO<sub>4</sub> physically mixed with MWNT. As can be seen, the MWNT@Li<sub>2</sub>FeSiO<sub>4</sub> composite showed better electron conductivity than pure Li<sub>2</sub>FeSiO<sub>4</sub> physically mixed with MWNT.

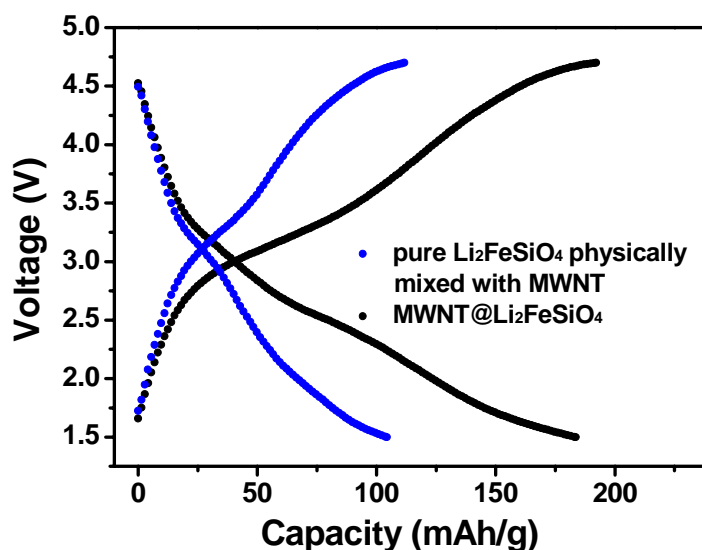

**Fig. S8** The 10th charge/discharge curves of the MWNT@Li<sub>2</sub>FeSiO<sub>4</sub> coaxial nanocable and pure Li<sub>2</sub>FeSiO<sub>4</sub> physically mixed with MWNT at a current density of 1C between 1.5 V and 4.7 V.

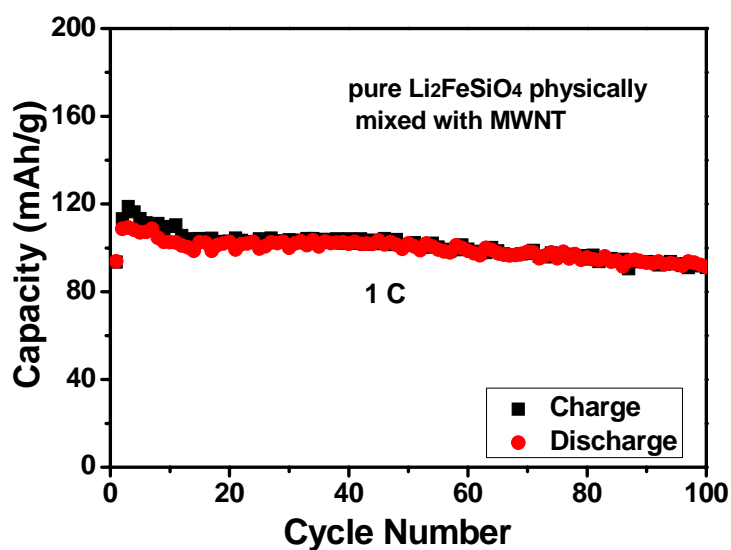

**Fig. S9** Cycling performance of pure  $\text{Li}_2\text{FeSiO}_4$  physically mixed with MWNT at a current density of 1C between 1.5 V and 4.7 V. The pure  $\text{Li}_2\text{FeSiO}_4$  physically mixed with MWNT showed a worse electrochemical performance than MWNT@ $\text{Li}_2\text{FeSiO}_4$  coaxial nanocable. It delivered capacities of  $110 \text{ mAh g}^{-1}$  in the initial cycles and finally decreased to  $90 \text{ mAh g}^{-1}$  after 100 cycles at 1C.

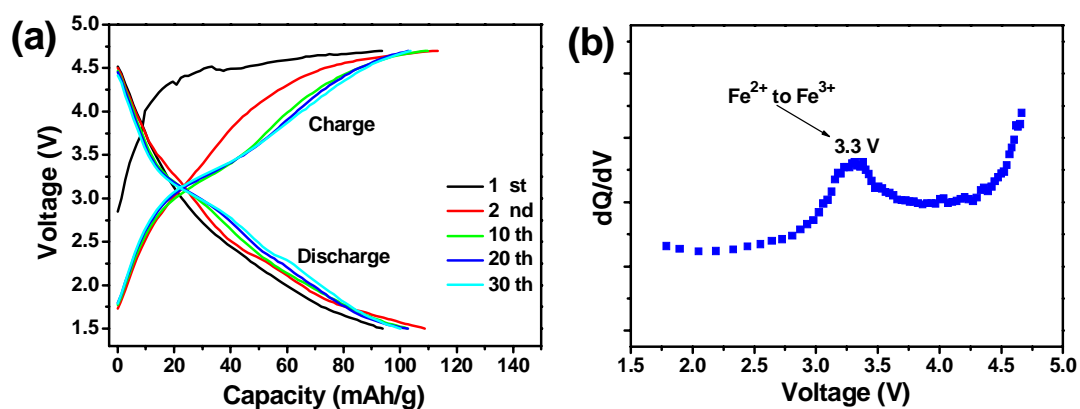

**Fig. S10** (a) typical charge/discharge curves, (b) dQ/dV vs voltage plot of the 30th charge curve of the pure  $\text{Li}_2\text{FeSiO}_4$  physically mixed with MWNT at a current density of 1C between 1.5 V and 4.7 V. Compared with the MWNT@ $\text{Li}_2\text{FeSiO}_4$  coaxial nanocable, the pure  $\text{Li}_2\text{FeSiO}_4$  only showed one oxidation peak, corresponding to the  $\text{Fe}^{2+}/\text{Fe}^{3+}$  redox couple, in the 30th charge curve.
